# Supplementary material for: A network meta-analysis on the efficacy of sixteen targeted drugs in combination with chemotherapy for treatment of advanced/metastatic colorectal cancer
Source: PubMed Central journal article supplement (PMC5356673; doi:10.18632/oncotarget.12994), 2016-10-31
Supplement: oncotarget-07-84468-s001.pdf [file oncotarget-07-84468-s001.pdf]

## **A network meta-analysis on the efficacy of sixteen targeted drugs in combination with chemotherapy for treatment of advanced/metastatic colorectal cancer**

### **Supplementary Materials**

**Supplementary Table S1: Main characteristics and methodological quality of eligibly studies.**

See [Supplementary\\_Table\\_S1](#)

**Supplementary Table S2: Estimated OR and 95% CI produced by random effects pairwise meta-analysis for efficacy events in metastatic/advanced colorectal cancer patients.** See [Supplementary\\_Table\\_S2](#)

**Supplementary Table S3: Odds ratios and 95% confidence intervals of 17 treatment modalities under six end indicators according to the network meta-analysis.** See [Supplementary\\_Table\\_S3](#)
