# Supplementary material for: A network meta-analysis on the efficacy of sixteen targeted drugs in combination with chemotherapy for treatment of advanced/metastatic colorectal cancer
Source: PubMed Central journal article supplement (PMC5356673; doi:10.18632/oncotarget.12994), 2016-10-31
Supplement: oncotarget-07-84468-s004.pdf [file oncotarget-07-84468-s004.pdf]

|                   |                    |                   |                    |                   |                    |                   |                   |                    |                   |                          |                        |                        |                    |                    |                    |                    |
|-------------------|--------------------|-------------------|--------------------|-------------------|--------------------|-------------------|-------------------|--------------------|-------------------|--------------------------|------------------------|------------------------|--------------------|--------------------|--------------------|--------------------|
| 0.72 (0.18, 3.11) | 1.84 (0.42, 9.24)  | 0.92 (0.21, 4.32) | 1.19 (0.25, 6.07)  | 0.67 (0.12, 4.11) | 1.30 (0.23, 7.58)  | 0.23 (0.02, 2.56) | 0.46 (0.06, 3.41) | 1.00 (0.18, 6.23)  | 0.46 (0.06, 3.33) | Conatumumab+Chemotherapy | 0.85 (0.12, 6.20)      | 0.58 (0.07, 4.67)      | 1.08 (0.16, 7.24)  | 1.54 (0.23, 11.45) | 1.45 (0.22, 10.22) | 1.63 (0.23, 12.64) |
| 0.84 (0.21, 3.37) | 2.14 (0.49, 9.91)  | 1.07 (0.24, 4.96) | 1.38 (0.29, 6.78)  | 0.78 (0.15, 4.32) | 1.51 (0.26, 8.90)  | 0.27 (0.02, 2.92) | 0.53 (0.06, 3.98) | 1.19 (0.21, 7.11)  | 0.54 (0.07, 3.76) | 1.18 (0.16, 8.68)        | Ganitumab+Chemotherapy | 0.67 (0.08, 5.17)      | 1.25 (0.19, 8.17)  | 1.81 (0.26, 12.97) | 1.69 (0.26, 11.41) | 1.91 (0.27, 14.37) |
| 1.26 (0.27, 6.28) | 3.22 (0.62, 18.63) | 1.62 (0.30, 8.92) | 2.08 (0.36, 12.58) | 1.16 (0.18, 7.99) | 2.28 (0.34, 16.09) | 0.41 (0.03, 5.09) | 0.79 (0.09, 6.81) | 1.79 (0.28, 12.57) | 0.82 (0.10, 6.63) | 1.74 (0.21, 14.48)       | 1.49 (0.19, 12.98)     | Gefitinib+Chemotherapy | 1.88 (0.25, 14.49) | 2.68 (0.37, 22.20) | 2.52 (0.35, 20.78) | 2.85 (0.35, 25.68) |
| 0.66 (0.19, 2.35) | 1.67 (0.45, 7.08)  | 0.84 (0.22, 3.44) | 1.08 (0.26, 4.80)  | 0.61 (0.13, 3.01) | 1.19 (0.24, 6.27)  | 0.22 (0.02, 2.12) | 0.42 (0.06, 2.97) | 0.92 (0.17, 5.10)  | 0.42 (0.07, 2.80) | 0.92 (0.14, 6.22)        | 0.80 (0.12, 5.34)      | 0.53 (0.07, 4.05)      | PB+Chemotherapy    | 1.42 (0.23, 9.06)  | 1.33 (0.22, 8.52)  | 1.50 (0.23, 10.58) |
| 0.47 (0.12, 1.76) | 1.19 (0.30, 4.96)  | 0.60 (0.17, 2.02) | 0.77 (0.17, 3.45)  | 0.43 (0.08, 2.24) | 0.85 (0.16, 4.32)  | 0.15 (0.01, 1.54) | 0.30 (0.04, 2.17) | 0.66 (0.12, 3.57)  | 0.30 (0.04, 1.94) | 0.65 (0.09, 4.32)        | 0.55 (0.08, 3.79)      | 0.37 (0.05, 2.71)      | 0.71 (0.11, 4.29)  | BC+Chemotherapy    | 0.94 (0.15, 5.98)  | 1.05 (0.16, 7.28)  |
| 0.50 (0.13, 1.77) | 1.27 (0.39, 4.28)  | 0.63 (0.16, 2.46) | 0.82 (0.20, 3.50)  | 0.46 (0.10, 2.11) | 0.89 (0.21, 3.98)  | 0.16 (0.01, 1.63) | 0.31 (0.04, 2.19) | 0.70 (0.22, 2.17)  | 0.32 (0.05, 2.00) | 0.69 (0.10, 4.54)        | 0.59 (0.09, 3.91)      | 0.40 (0.05, 2.88)      | 0.75 (0.12, 4.54)  | 1.06 (0.17, 6.55)  | AB+Chemotherapy    | 1.12 (0.19, 6.97)  |
| 0.44 (0.10, 1.77) | 1.13 (0.30, 4.13)  | 0.56 (0.13, 2.40) | 0.73 (0.15, 3.36)  | 0.41 (0.07, 2.08) | 0.80 (0.16, 3.89)  | 0.14 (0.01, 1.57) | 0.28 (0.03, 2.08) | 0.62 (0.12, 3.00)  | 0.28 (0.04, 1.89) | 0.61 (0.08, 4.28)        | 0.52 (0.07, 3.69)      | 0.35 (0.04, 2.89)      | 0.67 (0.09, 4.43)  | 0.95 (0.14, 6.06)  | 0.90 (0.14, 5.15)  | CB+Chemotherapy    |

Notes: SD = stable disease; PD = progressive disease; CR = complete response; PR = partial response; ORR = overall response rate; DCR = disease control rate; PB=Panitumumab+Bevacizumab;BC=Brivanib+Cetuximab;AB=Axitinib+Bevacizumab;CB=Cetuximab+Bevacizumab;
